# Supplementary material for: Hydrogels formed by anammox extracellular polymeric substances: structural and mechanical insights
Source: PubMed Central journal article supplement (PMC6690907; doi:10.1038/s41598-019-47987-8), 2019-08-12
Supplement: 41598_2019_47987_MOESM1_ESM.pdf [file 41598_2019_47987_MOESM1_ESM.pdf]

1           **Hydrogels formed by anammox extracellular polymeric substances: structural and**  
2           **mechanical insights.**

3           Tommaso Lotti<sup>a,c,\*</sup>, Emiliano Carretti<sup>b</sup>, Debora Berti<sup>b</sup>, Costanza Montis<sup>b</sup>, Stefano Del  
4           Buffa<sup>b†</sup>, Claudio Lubello<sup>c</sup>, Cuijie Feng<sup>a</sup>, Francesca Malpei<sup>a</sup>

5           <sup>a</sup> Department of Civil and Environmental Engineering, Polytechnic University of Milan, Via Golgi 39,  
6           20133 Milan, Italy

7           (E-mail: [tommaso.lotti@unifi.it](mailto:tommaso.lotti@unifi.it), [cuijie.feng@polimi.it](mailto:cuijie.feng@polimi.it), [francesca.malpei@polimi.it](mailto:francesca.malpei@polimi.it))

8           <sup>b</sup> Department of Chemistry “Ugo Schiff” & CSGI Consortium, University of Florence, Via della  
9           Lastruccia 3-13, 50019 Sesto Fiorentino (FI), Florence, Italy

10          (E-mail: [emiliano.carretti@unifi.it](mailto:emiliano.carretti@unifi.it), [debora.beriti@unifi.it](mailto:debora.beriti@unifi.it), [montis@csgi.unifi.it](mailto:montis@csgi.unifi.it))

11          <sup>c</sup> Civil and Environmental Engineering Department, University of Florence, Via di Santa Marta 3, 50139  
12          Florence, Italy

13          (E-mail: [tommaso.lotti@unifi.it](mailto:tommaso.lotti@unifi.it), [claudio.lubello@unifi.it](mailto:claudio.lubello@unifi.it))

14          †Present affiliation: Université de Strasbourg, CNRS, ISIS, 8 allée Gaspard Monge, 67000 Strasbourg,  
15          France (E-mail : [delbuffa@unistra.fr](mailto:delbuffa@unistra.fr))

16          \***Corresponding author**

20

21

## Supplementary information

22

23

24

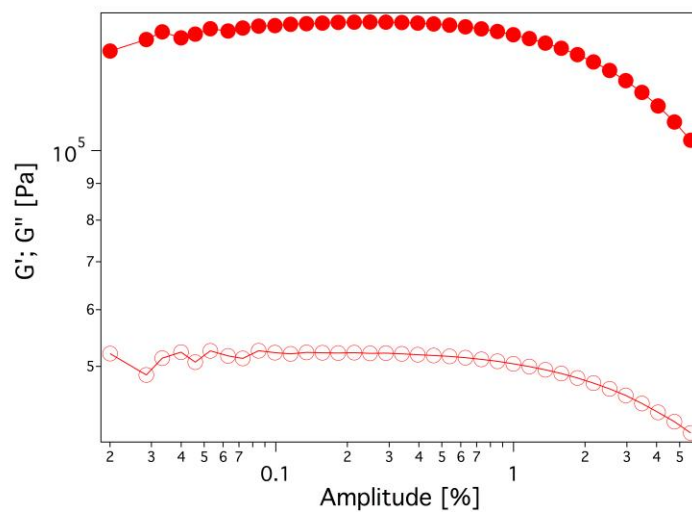

25

26 **Figure A1.** Amplitude sweep curve of the 20 wt% EPS based system (oscillation frequency,  $\omega$ :

27

1 Hz).

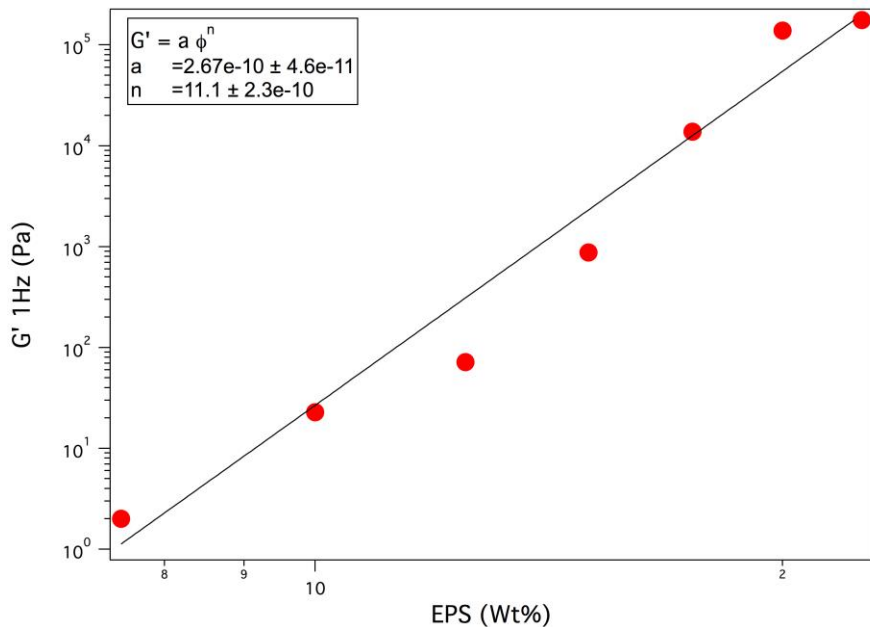

28

29 **Figure A2.** Double-logarithmic scale representation describing the effect of the concentration

30 of EPS network on the value of the elastic modulus  $G'$  at  $\omega=1$  Hz. The line represents the best

31 linear fitting.

32

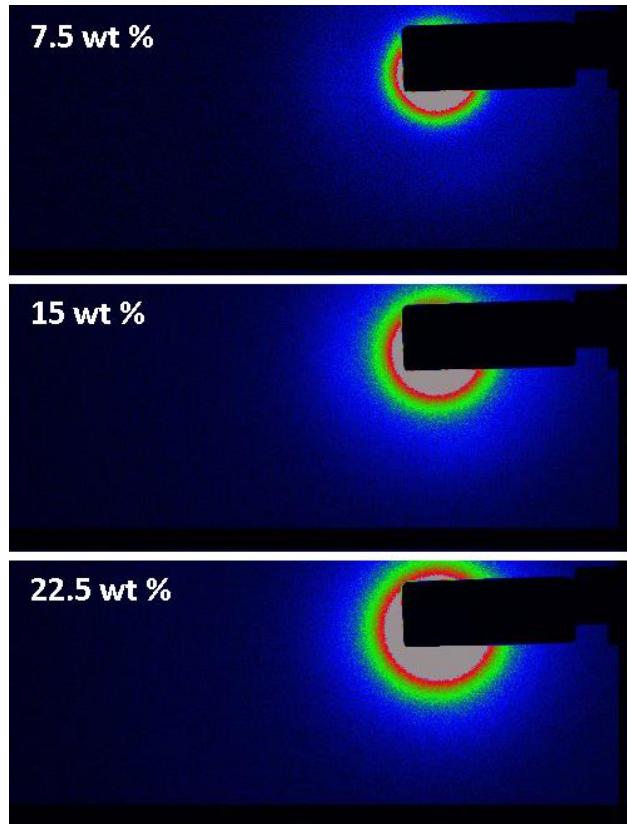

33

34

35

36

**Figure A3.** SAXS raw data: detector 2D images of of EPS/water samples with increasing amounts of EPS (7.5, 15, 22.5 wt%).

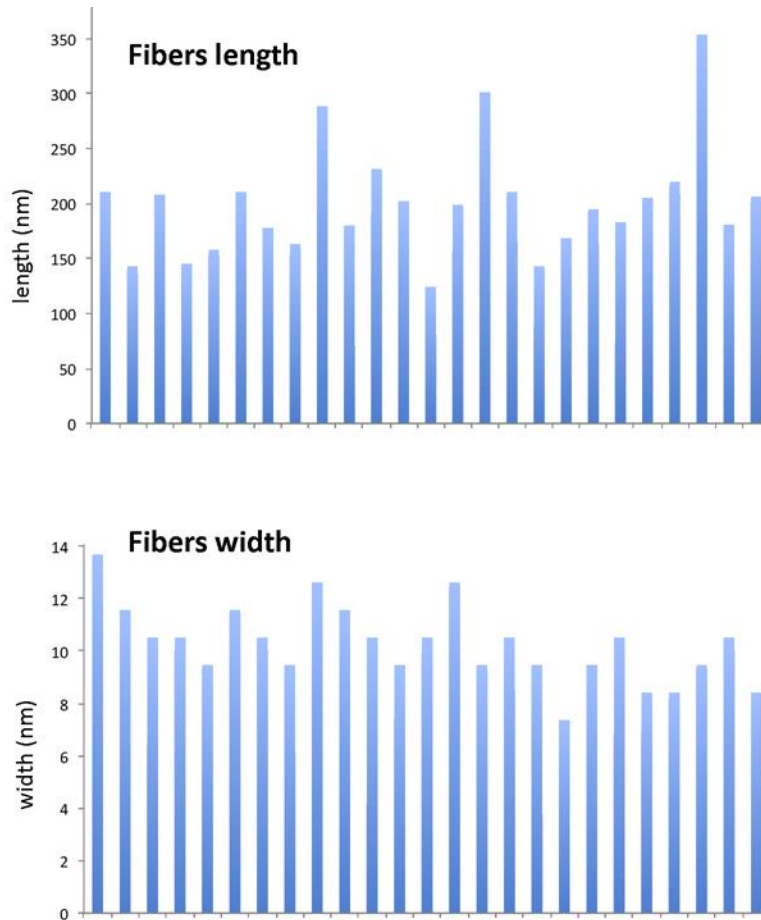

37

38

**Figure A4.** Size analysis of fibers in the native globule: length (upper panel) and width (lower panel) of 25 different fibers, from 5 different TEM images where evaluated. Image J was employed for size analysis. The resulting estimated values are: fibers length  $200 \pm 50$  nm, fibers width  $10 \pm 1$  nm.

39

40

41

42

43

44

45

46

47

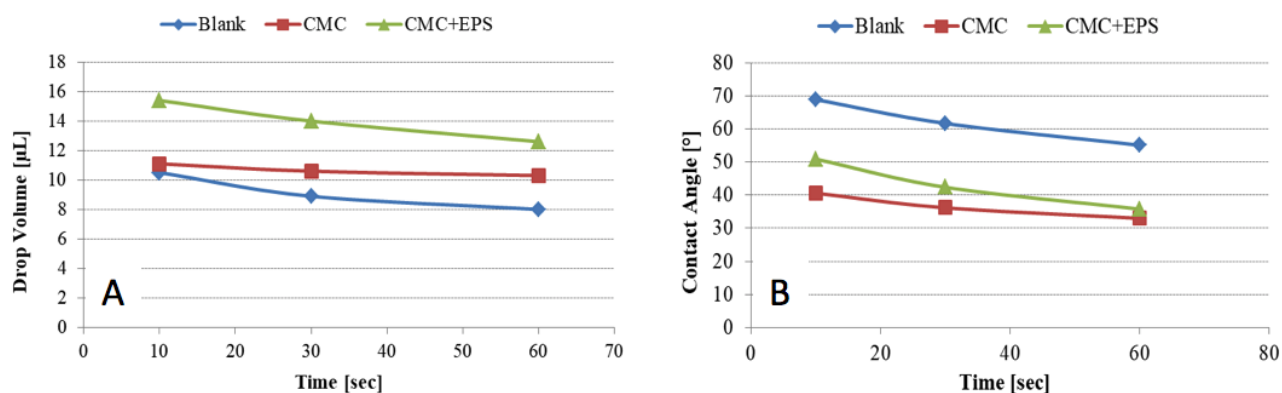

48  
49 **Figure A5.** Evolution in time of the volume (left) and contact angle (right) of a water drop  
50 deposited on paper sheets untreated (Blank) and coated with CMC or CMC/EPS mixture.  
51

52

53

**Table A1.** Water absorptiveness (Cobb method).

| Sample  | Coating | Water absorbance [g/m <sup>2</sup> ] |           |
|---------|---------|--------------------------------------|-----------|
|         |         | Coated side                          | Back side |
| Blank   | none    | 45.3                                 | 60.3      |
| Control | CMC     | 43.0                                 | 51.8      |
| Test    | EPS+CMC | 31.5                                 | 40.0      |

54

55

56 **Table A2.** Grease resistance in terms of permeability and surface repellency.

| Sample  | Coating | Permeability [sec] | Surface Repellency Degree |           |
|---------|---------|--------------------|---------------------------|-----------|
|         |         |                    | Coated side               | Back side |
| Blank   | none    | < 30               | 1                         | 1         |
| Control | CMC     | 30                 | 3                         | 3         |
| Test    | EPS+CMC | 120                | 5                         | 3         |

57
